# Supplementary material
Source: Springer Nature journal article supplement (https://www.springermedizin.de/resource/supplementary/12885_2014_4909_MOESM4_ESM.pdf/9467692)

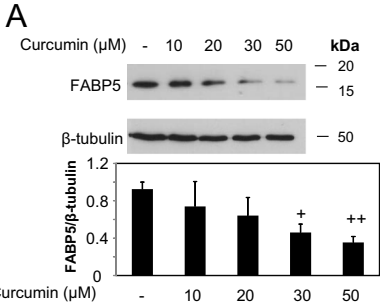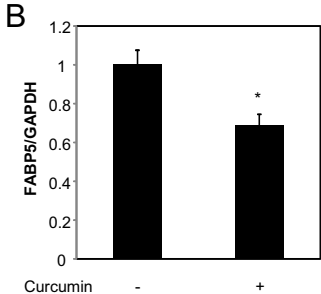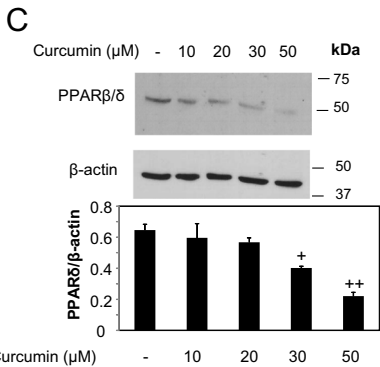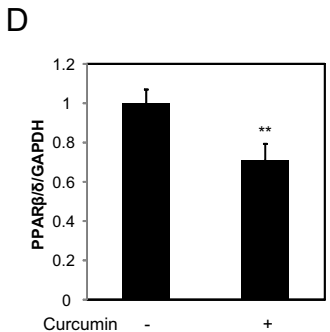

Supplement: MOESM4 [file 9467692]
